# Supplementary material for: Is health politically irrelevant? Experimental evidence during a global pandemic
Source: PubMed Central journal article supplement (PMC7590354; doi:10.1136/bmjgh-2020-004222), 2020-10-23
Supplement: bmjgh-2020-004222supp001.pdf [file bmjgh-2020-004222supp001.pdf]

## Appendix A: Questionnaire

*What follows is the questionnaire used for the United States. Similar questionnaires were devised for the United Kingdom (in English) and India (in English and Hindi).*

### Preliminary

Q1 You are being invited to participate in a research study conducted by Aaron Reeves from the University of Oxford. This study is being conducted in a number of countries and you have been invited to participate because you live in the United States.

*Why are we doing this research study?* The purpose of this research study is to understand your opinions about current events, and how they are affecting our lives.

*Who can participate in this research study?* Anyone can participate in this study as long as they are from US.

*What will I be asked to do and how much time will it take?* If you agree to take part in this study, you will be asked to complete a short online survey. This survey will ask about your knowledge of and opinions about current events, and it will take you approximately 5 minutes to complete.

*What are my risks of being in this research study?* There are no risks to you by participating this research. There will be no inconveniences to you other than the time you spend answering the questions. All data will be anonymous and confidential.

*How will my personal information be protected?* MTurk protects your anonymity and so it will be impossible for anyone to identify who you are. All the questions we are planning to ask are general, such as age and sex, and will therefore be too general to ever identify anyone.

You must be of legal age to participate in this study.

If you have any questions, please contact the study lead at [aaron.reeves@spi.ox.ac.uk](mailto:aaron.reeves@spi.ox.ac.uk)

Dr Aaron Reeves, PhD, Oxford University

By clicking "continue," you confirm that you have been informed of the study's goals and procedure in writing, that you have understood this information, and that you are aware that participation is

voluntary. You may abort participation at any point without citing a reason and without incurring any negative consequences as a result of doing so.

## Control Condition

[No additional questions]

## Treatment #1: Economics

Q6 As you are probably aware, the Coronavirus disease (Covid-19) has spread around the world. Experts are wrestling with the impact of this pandemic on the US economy. Some estimates suggest that the economy could shrink by 3.2% this year, 52.8 million people could end up without work (about 32% of the entire workforce), and that the value of stocks and shares could fall by around 30%.

On the next page, there will be a few factual questions about this information.

Q7 Here are some questions about the information presented on the previous page. Please answer to the best of your ability. If you are not sure, you may return to the previous page. (All answers must be correct in order to proceed in the survey.)

[next page...]

Q8 What is the estimated number of job losses created by Covid-19 in the United States, as stated on the previous page?

- It was **more than** 50 million (1)
- It was **less than** 50 million (2)

OR...

Q11 How much is the stock market expected to fall as a result of Covid-19?

- It was **more than** 20% (1)
- It was **less than** 20% (2)

## Treatment #2: Health

Q12 As you are probably aware, the Coronavirus disease (Covid-19) has spread around the world. Experts are wrestling with the impact of this pandemic on public health in the US. One estimate suggests that around 12.9 million will require hospitalization (3.9% of the population), around 3.7 million will need critical care, and over 2.8 million people will die (around 0.8% of the population). At present, there is no vaccine for Coronavirus and no cure.

On the next page, there will be a few factual questions about this information.

[Next page...]

Q13 Here are some questions about the information presented on the previous page. Please answer to the best of your ability. If you are not sure, you may return to the previous page. (All answers must be correct in order to proceed in the survey).

Q14 What is the estimated number of fatalities from Covid-19 in the United States, as stated on the previous page? (If you are not sure, check back on the previous page).

- It was **more than** 2 million people (1)
- It was **less than** 2 million people (2)

OR...

Q15 How many people will require critical care in an Intensive Care Unit?

- It was **more than** 3 million people (1)
- It was **less than** 3 million people (2)

## Outcomes

Q3 If a national election were held today, on a scale of 0 (sad) to 100 (happy) how would you feel if Trump and the Republican party were reelected?

0 10 20 30 40 50 60 70 80 90 100

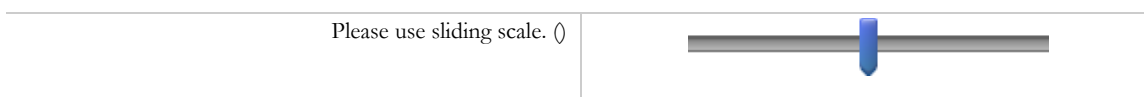

Q4 On a scale of 0 (not important at all) to 100 (extremely important), how important are each of these policy areas for you? (To what extent should the government pay attention to these policy areas?)

0 10 20 30 40 50 60 70 80 90 100

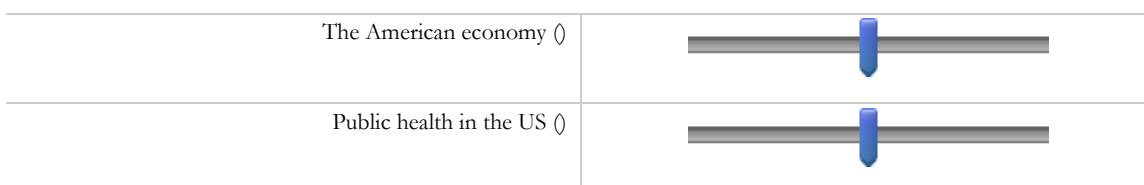

Q5 On a scale of 0 (strongly disagree) to 100 (strongly agree), how much do you agree/disagree with the following statement:

0 10 20 30 40 50 60 70 80 90 100

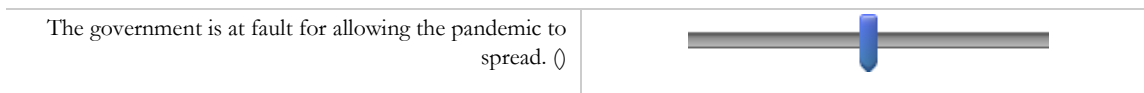

Q24 On a scale of 0 (disagree) to 100 (agree), how do you feel about the following statement:

0 10 20 30 40 50 60 70 80 90 100

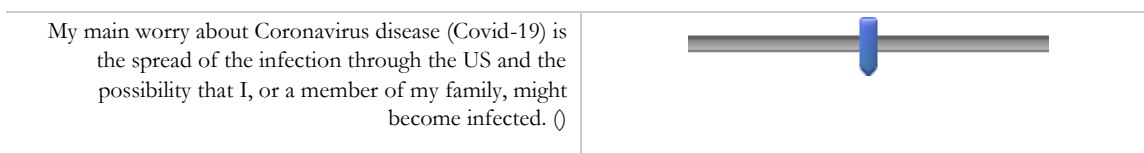

Q37 On a scale of 0 (disagree) to 100 (agree), how do you feel about the following statement:

0 10 20 30 40 50 60 70 80 90 100

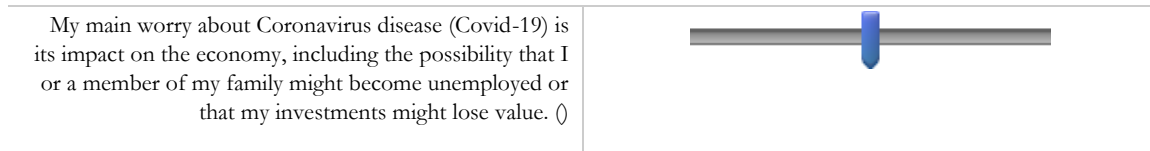

Q23 On a scale of 0 (no responsibility at all) to 100 (total responsibility), how much responsibility does the government bear...

0 10 20 30 40 50 60 70 80 90 100

|                                              |                                                                                    |
|----------------------------------------------|------------------------------------------------------------------------------------|
| For the state of the American economy? ()    |  |
| For the state of public health in the US? () |  |

## Background Questions

Q24 In the following questions we ask you to tell us a bit about yourself.

Q25 Gender

- Male (1)
- Female (2)
- Other (please specify) (3) \_\_\_\_\_

Q26 What year were you born?

▼ 2002 (1) ... 1922 (81)

Q29 How would you describe your current employment?

- Not employed by virtue of retirement, school, or by choice (1)
- Unemployed and looking for work (2)
- Part-time employed (3)
- Full-time employed (4)

Q27 What part of the US do you live in?

▼ Alabama (1) ... Wyoming (81)

Q28 How would you characterize the area where you live?

- Urban (1)
- Suburban/Peri-urban (2)
- Rural (3)

Q30 What is the highest educational level that you have attained, or expect to attain?

- No formal education (1)
- Incomplete primary school (2)
- Complete primary school (3)
- Incomplete secondary school: technical/vocational type (4)
- Complete secondary school: technical/vocational type (5)
- Incomplete secondary school: university-preparatory type (6)
- Complete secondary school: university-preparatory type (7)
- Some university-level education, without degree (8)
- University-level education, with degree (9)

Q31 What is your annual household income? (USD)

- Below \$575 per week (or below \$30,000 per year) (1)
- Below \$960 per week but above \$575 per week (or below \$50,000 per year but above \$30,000 per year) (2)
- Below \$1,900 per week but above \$960 per week (or below \$100,000 per year but above \$50,000 per year) (3)



- Above \$1,900 per week (or above \$100,000 per year) (4)

Q32 In the previous question, we asked you about your income in general categories. It would be helpful if you could also take a guess at your weekly, monthly, or annual salary (choose one) last year. Please enter a number without commas. (This information is completely confidential).

- Weekly (\$) (1) \_\_\_\_\_
- Monthly (\$) (2) \_\_\_\_\_
- Annual (\$) (3) \_\_\_\_\_

Q33 How much money have you saved for emergencies such as job loss or ill health?

- Less than a months salary (1)
- More than a month but less than three months salary (2)
- More than three months but less than six months salary (3)
- More than six months salary (4)

Q34 In general, would you say that your health is...

- Poor (1)
- Fair (2)
- Good (3)
- Very good (4)
- Excellent (5)

Q35 Have you participated in other surveys focused on Coronavirus?

Yes (1)

No (2)

## *Appendix B:* Descriptive Statistics

Table B1: Descriptive statistics for each country sample

|                                            | India | UK  | US   | ALL   |                                                   | India | UK | US | ALL |
|--------------------------------------------|-------|-----|------|-------|---------------------------------------------------|-------|----|----|-----|
| <i>Sample Size</i>                         |       |     |      |       | <i>Fear employment disruption (0-100)</i>         |       |    |    |     |
| Control (N)                                | 501   | 194 | 509  | 1,204 | Control                                           | 72    | 59 | 65 | 67  |
| Econ Treatment (N)                         | 511   | 198 | 529  | 1,238 | Econ Treatment                                    | 72    | 62 | 62 | 66  |
| Health Treatment (N)                       | 487   | 223 | 496  | 1,206 | Health Treatment                                  | 69    | 59 | 61 | 64  |
| Total (N)                                  | 1499  | 615 | 1534 | 3648  | Total                                             | 72    | 60 | 63 | 66  |
| Total (%)                                  | 41    | 17  | 42   | 100   | <i>Fear contracting Covid (0-100)</i>             |       |    |    |     |
| <i>Savings equaling consumption of (%)</i> |       |     |      |       | Control                                           | 63    | 70 | 74 | 69  |
| Less than a Month                          | 39    | 41  | 26   | 34    | Econ Treatment                                    | 66    | 70 | 73 | 70  |
| Less than 3 Months                         | 35    | 29  | 29   | 32    | Health Treatment                                  | 66    | 71 | 73 | 70  |
| Less than 6 Months                         | 10    | 12  | 20   | 15    | Total                                             | 65    | 71 | 73 | 69  |
| More than 6 Months                         | 16    | 18  | 24   | 20    | <i>Govt can affect economy (0-100)</i>            |       |    |    |     |
| <i>Self-reported health (%)</i>            |       |     |      |       | Control                                           | 76    | 75 | 79 | 77  |
| Poor                                       | 4     | 2   | 2    | 3     | Econ Treatment                                    | 73    | 76 | 78 | 76  |
| Fair                                       | 11    | 13  | 11   | 11    | Health Treatment                                  | 71    | 73 | 77 | 74  |
| Good                                       | 43    | 35  | 36   | 39    | Total                                             | 74    | 75 | 78 | 76  |
| Very Good                                  | 29    | 34  | 37   | 33    | <i>Govt can affect public health (0-100)</i>      |       |    |    |     |
| Excellent                                  | 12    | 16  | 15   | 14    | Control                                           | 81    | 87 | 83 | 83  |
| <i>Support for incumbent (0-100)</i>       |       |     |      |       | Econ Treatment                                    | 81    | 87 | 84 | 83  |
| Control                                    | 65    | 46  | 47   | 53    | Health Treatment                                  | 81    | 86 | 84 | 83  |
| Econ Treatment                             | 66    | 44  | 45   | 52    | Total                                             | 81    | 87 | 84 | 83  |
| Health Treatment                           | 65    | 43  | 46   | 52    | <i>Govt responsible for economy (0-100)</i>       |       |    |    |     |
| Total                                      | 65    | 44  | 46   | 53    | Control                                           | 74    | 74 | 74 | 74  |
| <i>Govt at fault (0-100)</i>               |       |     |      |       | Econ Treatment                                    | 71    | 75 | 73 | 73  |
| Control                                    | 49    | 58  | 61   | 56    | Health Treatment                                  | 72    | 75 | 74 | 73  |
| Econ Treatment                             | 50    | 54  | 58   | 54    | Total                                             | 72    | 75 | 74 | 73  |
| Health Treatment                           | 51    | 58  | 59   | 55    | <i>Govt responsible for public health (0-100)</i> |       |    |    |     |
| Total                                      | 50    | 57  | 59   | 55    | Control                                           | 77    | 79 | 77 | 78  |
|                                            |       |     |      |       | Econ Treatment                                    | 77    | 80 | 77 | 78  |
|                                            |       |     |      |       | Health Treatment                                  | 78    | 80 | 77 | 78  |
|                                            |       |     |      |       | Total                                             | 77    | 80 | 77 | 78  |

Table B2: Sample characteristics compared to estimates in the underlying population

|                              | India  |            | United Kingdom |            | United States |            | Total  |
|------------------------------|--------|------------|----------------|------------|---------------|------------|--------|
|                              | Sample | Population | Sample         | Population | Sample        | Population | Sample |
| <i>Sample size</i>           |        |            |                |            |               |            |        |
| Total (N)                    | 1499   | --         | 615            | --         | 1534          | --         | 3648   |
| Total (%)                    | 41     | --         | 17             | --         | 42            | --         | 100    |
| <i>Gender (%)</i>            |        |            |                |            |               |            |        |
| Male                         | 73     | 52         | 68             | 49         | 58            | 50         | 66     |
| Female                       | 27     | 48         | 31             | 51         | 42            | 50         | 34     |
| Others                       | 0      | -          | 1              | -          | 0             | -          | 0      |
| <i>Urban/Rural (%)</i>       |        |            |                |            |               |            |        |
| Rural                        | 19     | 66         | 14             | 17         | 14            | 18         | 16     |
| Urban, suburban              | 81     | 34         | 86             | 83         | 86            | 82         | 84     |
| <i>Education (%)</i>         |        |            |                |            |               |            |        |
| Completed university         | 78     | 11         | 58             | 29         | 61            | 36         | 68     |
| Some university              | 9      | 3          | 16             | 18         | 11            | 20         | 11     |
| No university                | 13     | 87         | 26             | 47         | 28            | 44         | 21     |
| <i>Income quadrants (%)</i>  |        |            |                |            |               |            |        |
| Bottom quartile              | 12     | 25         | 24             | 25         | 21            | 25         | 18     |
| Second quartile              | 32     | 25         | 25             | 25         | 27            | 25         | 29     |
| Third quartile               | 28     | 25         | 19             | 25         | 35            | 25         | 29     |
| Fourth quartile              | 28     | 25         | 31             | 25         | 17            | 25         | 24     |
| <i>Employment status (%)</i> |        |            |                |            |               |            |        |
| Full-time                    | 65     | -          | 49             | 62         | 70            | 62         | 65     |
| Retired or no work           | 5      | -          | 18             | 23         | 9             | 21         | 9      |
| Part-time                    | 21     | -          | 19             | 12         | 13            | 13         | 17     |
| Unemployed                   | 9      | 9          | 14             | 3          | 8             | 4          | 9      |
| <i>Age (Median, over 18)</i> | 31     | 35         | 29             | 48         | 37            | 45         | 33     |

Notes: Gender, Urban/Rural distinction in population comes from World Bank Indicators. Education for the UK comes from the European Social Survey from 2018 and for India and the US from the World Values Survey in 2014. Employment status for US comes from Labor Force Statistics from the Current Population Survey, for the UK it comes from the Office for National Statistics and are based on all population above the age 18, for India the unemployment rate comes from Centre for Monitoring Indian Economy as reported. Median age for US, UK, and India comes from latest census projections.

Table B3: Distribution of support for the incumbent across the feeling thermometer by country

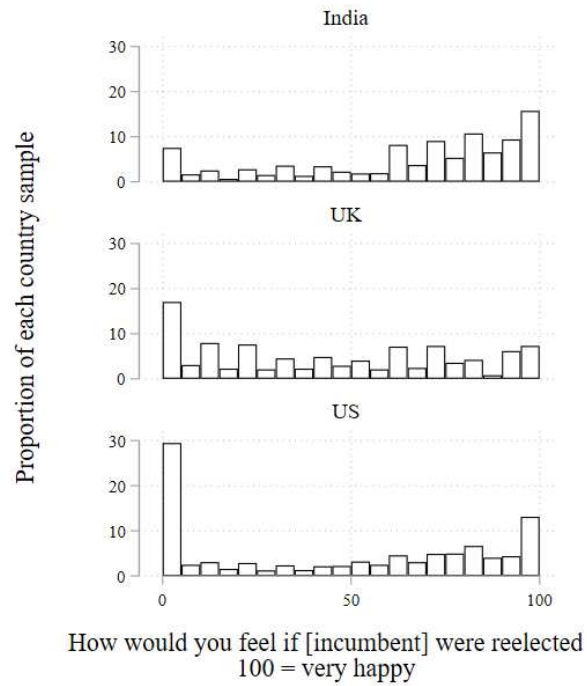

## *Appendix C:* Additional Analyses

Table C1: Government at Fault, Disaggregated by Subgroup

| Subgroups                    | Control | Economic Treatment | Health Treatment | p-value of joint test across treatment conditions |
|------------------------------|---------|--------------------|------------------|---------------------------------------------------|
| <i>Gender</i>                |         |                    |                  |                                                   |
| Male                         | 55.82   | 54.11              | 54.21            | 0.45                                              |
| Female                       | 55.04   | 52.98              | 57.80            | 0.07                                              |
| <i>Urban/Rural</i>           |         |                    |                  |                                                   |
| Rural                        | 51.69   | 48.49              | 52.65            | 0.36                                              |
| Suburban/Peri-urban          | 50.96   | 51.99              | 52.19            | 0.83                                              |
| Urban                        | 59.65   | 56.43              | 58.28            | 0.16                                              |
| <i>Economic status</i>       |         |                    |                  |                                                   |
| Full-time employed           | 55.66   | 54.47              | 55.64            | 0.67                                              |
| Retired                      | 55.12   | 48.60              | 54.78            | 0.21                                              |
| Part-time employed           | 54.52   | 53.33              | 53.65            | 0.92                                              |
| Unemployed                   | 59.23   | 54.51              | 59.47            | 0.37                                              |
| <i>Education</i>             |         |                    |                  |                                                   |
| University                   | 55.14   | 52.92              | 54.51            | 0.31                                              |
| Some university              | 57.98   | 56.88              | 57.15            | 0.95                                              |
| No university                | 55.96   | 54.53              | 57.29            | 0.59                                              |
| <i>Income</i>                |         |                    |                  |                                                   |
| Bottom quartile              | 59.63   | 58.49              | 57.69            | 0.79                                              |
| 2nd quartile                 | 58.28   | 57.27              | 59.51            | 0.62                                              |
| 3rd quartile                 | 56.94   | 53.95              | 55.52            | 0.40                                              |
| Top quartile                 | 48.03   | 46.71              | 49.08            | 0.62                                              |
| <i>Health</i>                |         |                    |                  |                                                   |
| Good/Fair/Poor               | 57.04   | 55.39              | 56.72            | 0.57                                              |
| Excellent/very good          | 54.14   | 51.62              | 53.92            | 0.30                                              |
| <i>Other Covid-19 survey</i> |         |                    |                  |                                                   |
| No                           | 51.78   | 50.60              | 51.40            | 0.86                                              |
| Yes                          | 57.43   | 55.18              | 57.24            | 0.24                                              |

*Statement:* The government is at fault for allowing the pandemic to spread. 0=strongly disagree, 100=strongly agree. Results disaggregated by sub-group. Test statistics are joint-Wald tests of whether each treatment condition is equal to the control condition within each sub-category. We are testing whether the treatments vary by sub-groups. The p-value is for the F-Test.



Table C2: Support for Incumbent, Disaggregated by Subgroup

| Subgroups                    | Control | Economic Treatment | Health Treatment | p-value of joint test across treatment conditions |
|------------------------------|---------|--------------------|------------------|---------------------------------------------------|
| <i>Gender</i>                |         |                    |                  |                                                   |
| Male                         | 55.28   | 53.52              | 52.89            | 0.35                                              |
| Female                       | 50.67   | 52.79              | 51.87            | 0.67                                              |
| <i>Urban/Rural</i>           |         |                    |                  |                                                   |
| Rural                        | 51.75   | 54.18              | 54.08            | 0.73                                              |
| Suburban/Peri-urban          | 49.64   | 48.52              | 49.03            | 0.90                                              |
| Urban                        | 56.63   | 56.16              | 53.97            | 0.35                                              |
| <i>Economic status</i>       |         |                    |                  |                                                   |
| Full-time employed           | 54.87   | 53.17              | 55.05            | 0.49                                              |
| Retired                      | 46.75   | 53.89              | 52.23            | 0.29                                              |
| Part-time employed           | 52.69   | 52.97              | 48.23            | 0.28                                              |
| Unemployed                   | 51.89   | 51.94              | 39.24            | 0.01                                              |
| <i>Education</i>             |         |                    |                  |                                                   |
| University                   | 52.74   | 52.40              | 51.55            | 0.77                                              |
| Some university              | 54.38   | 50.92              | 53.34            | 0.70                                              |
| No university                | 56.04   | 57.00              | 54.96            | 0.80                                              |
| <i>Income</i>                |         |                    |                  |                                                   |
| Bottom quartile              | 53.54   | 51.65              | 50.86            | 0.71                                              |
| 2nd quartile                 | 54.72   | 50.87              | 50.35            | 0.18                                              |
| 3rd quartile                 | 50.08   | 53.61              | 54.17            | 0.23                                              |
| Top quartile                 | 56.07   | 55.54              | 53.17            | 0.57                                              |
| <i>Health</i>                |         |                    |                  |                                                   |
| Good/Fair/Poor               | 51.99   | 50.59              | 50.56            | 0.70                                              |
| Excellent/very good          | 55.37   | 56.54              | 54.44            | 0.59                                              |
| <i>Other Covid-19 survey</i> |         |                    |                  |                                                   |
| No                           | 54.35   | 55.30              | 52.39            | 0.49                                              |
| Yes                          | 53.31   | 52.26              | 52.45            | 0.80                                              |

*Question:* If a national election were held today, would you like to see [incumbent party and party leader] reelected? Results disaggregated by sub-group. Test statistics are joint-Wald tests of whether each treatment condition is equal to the control condition within each sub-category. We are testing whether the treatments vary by sub-groups. The p-value is for the F-Test.

*Figure C1: Treatment effects among those with moderate views*

One possible explanation for our results is that polarized people will have largely stable responses to our questions irrespective of their exposure to making the economic and the health effects of Covid-19 more salient. It is possible, however, that people with moderate views may be responding to our treatments but these treatment effects are masked by the stable views of the polarized. To test this possibility, we first identify those with moderate views on our political outcomes in the control group—those responding absence of any treatment. We focus on the control group initially because we are interested in identifying those individuals who, in the absence of the treatment, would have had moderate views. We do this by focusing on those who reported a score between 36 and 65 on the feeling thermometer. There are 278 people in this range for the measure of government fault and 230 people for the incumbent measure.

We then use Coarsened Exact Matching to match these people with moderate views in the absence of the treatment with similar individuals who were exposed to either of the treatment conditions. By matching on these individuals, we remove from our analysis those individuals in the treatment conditions who are dis-similar from those with moderate views in the control group. We match on the following variables: on their socio-economic status (low, middle, and high), their age (30 and under and over 30), their health, whether they live in an urban, a peri-urban, or an urban area, their gender, and the country in which they live. There are 406 strata (or unique cells). CEM is usually assessed using a global fit statistic  $\zeta_1$  (or L1). This fit statistic tells us how imbalanced the data sets are before the matching procedure (1 = completely separable or no-overlap while 0 = perfectly balanced). In our analysis, before the matching procedure,  $\zeta_1$  is 0.62 while after the matching procedure  $\zeta_1$  has fallen to basically 0, suggesting there is no imbalance left in the sample.

Our matching procedure identifies 1554 individuals who are matched to 266 individuals with weakly-held views on whether government was at fault (35 people could not be matched from the control group). For the incumbent analysis, our matching procedure identifies 1376 individuals who are matched to 197 individuals with weakly-held views on the incumbent (33 people could not be matched from the control group). We then estimate two OLS regression models (replicating our earlier analysis) for each outcome: one is unadjusted and the other is a 'doubly robust' model (i.e., matched sample while controlling for the matching variables).

We find that even among this group of people who seem to have moderate views that our treatments are unable to alter whether they blame government for the spread of the virus or their support for the incumbent.

(a) Incumbent support

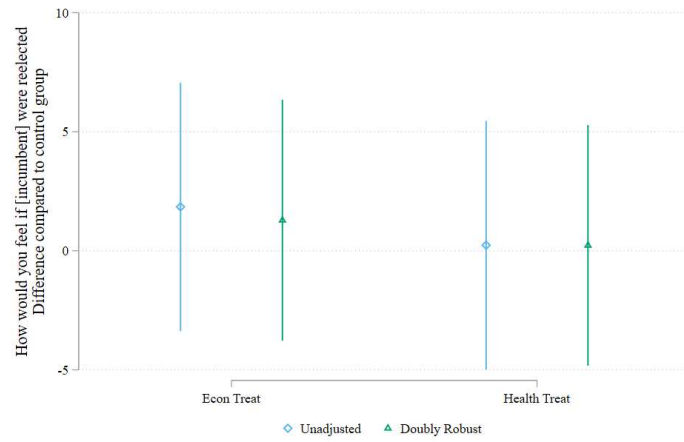

(b) Government at fault

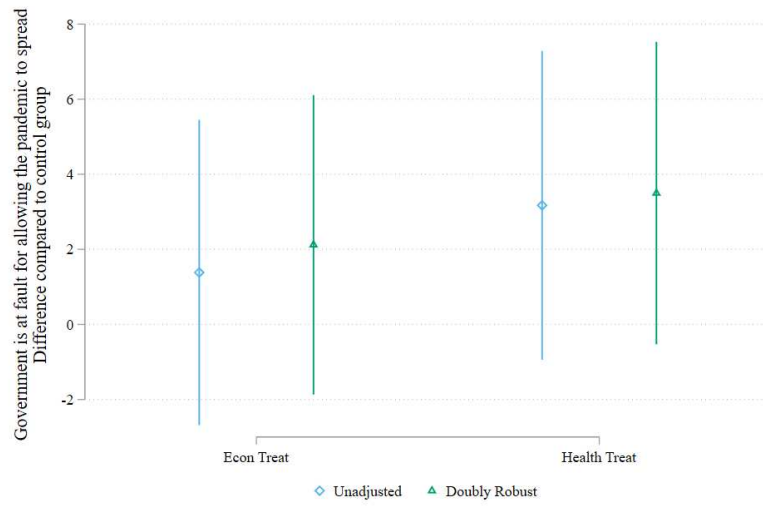

**Figure C2: Changes over Time**

The US is excluded in these because all surveys were completed within several days, leaving no variation over time to explore.

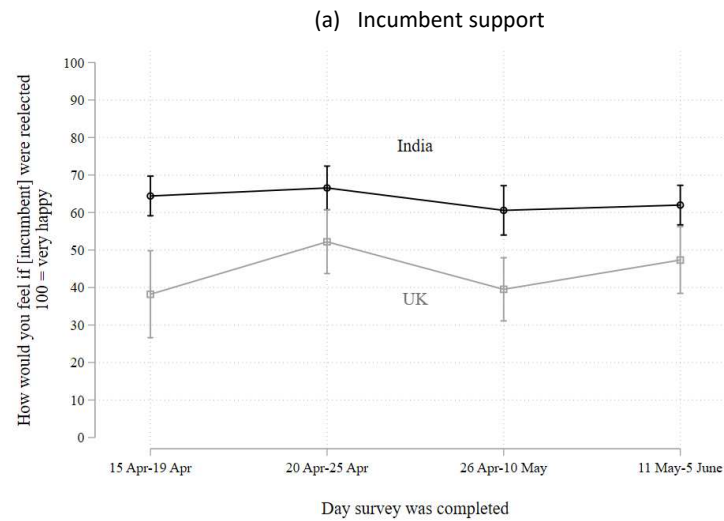

**Question:** If a national election were held today, would you like to see [incumbent party and party leader] reelected?

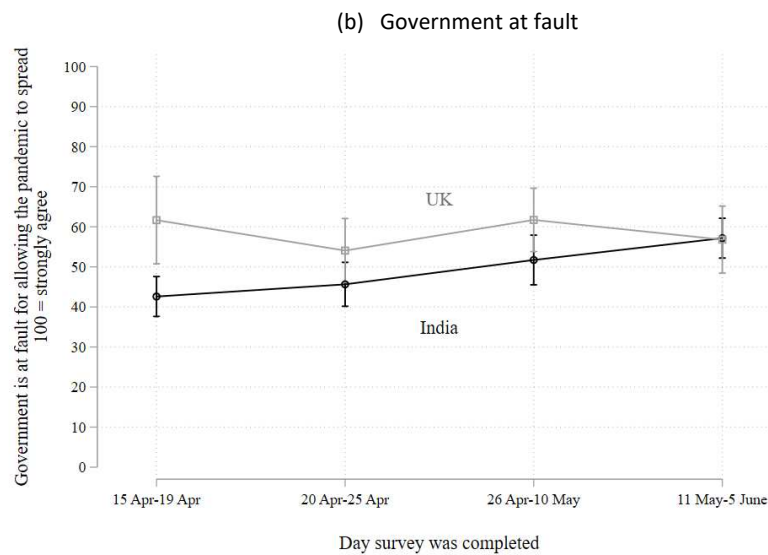

**Statement:** The government is at fault for allowing the pandemic to spread. 0=strongly disagree, 100=strongly agree.

We also test whether the treatment effect varies according to when people participated in the experiment. We find no clear variation in the treatment effects.

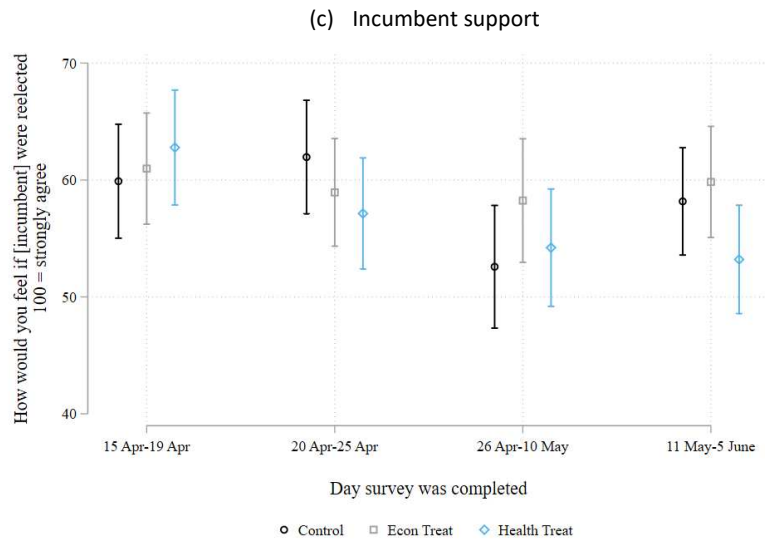

*Question:* If a national election were held today, would you like to see [incumbent party and party leader] reelected?

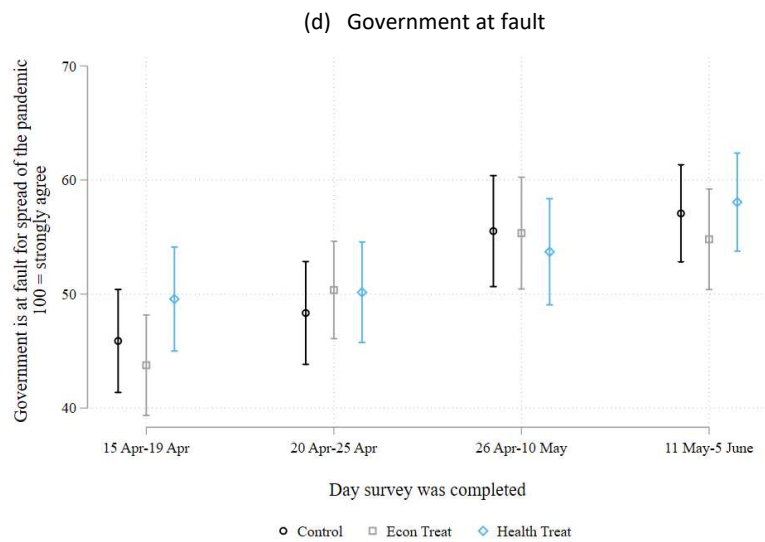

*Statement:* The government is at fault for allowing the pandemic to spread. 0=strongly disagree, 100=strongly agree.
